# Supplementary material for: Deferoxamine, deferasirox, and deferiprone triple iron chelator combination therapy for transfusion-dependent β-thalassaemia with very high iron overload: a randomised clinical trial
Source: PubMed Central journal article supplement (PMC11718414; doi:10.1016/j.lansea.2024.100495), 2024-10-15
Supplement: mmc2.pdf [file mmc2.pdf]

## Supplementary Tables

**Manuscript title:** Deferoxamine, deferasirox, and deferiprone triple iron chelator combination therapy for transfusion-dependent  $\beta$ -thalassaemia with very high iron overload: a randomised clinical trial

**Supplementary Table 1 – Exact doses of medication received by trial participants**

| Study Number | Treatment arm | Gender | Age (years) | Weight (kg) | Deferoxamine dose (mg/od) | Deferasirox dose (mg/od) | Deferiprone dose (mg/tds) |
|--------------|---------------|--------|-------------|-------------|---------------------------|--------------------------|---------------------------|
| 1            | Intervention  | Male   | 31          | 69          | 2000                      | 2400                     | 1500                      |
| 2            | Control       | Male   | 36          | 60          | 1500                      | 2400                     | -                         |
| 3            | Intervention  | Female | 31          | 69          | 1500                      | 2400                     | 1500                      |
| 4            | Intervention  | Male   | 31          | 52          | 2000                      | 2000                     | 1250                      |
| 5            | Intervention  | Female | 32          | 45          | 2000                      | 1800                     | 1000                      |
| 6            | Intervention  | Male   | 28          | 42          | 2000                      | 1700                     | 1000                      |
| 7            | Control       | Male   | 25          | 45          | 1500                      | 1800                     | -                         |
| 8            | Intervention  | Male   | 28          | 59          | 2000                      | 2200                     | 1250                      |
| 9            | Intervention  | Female | 26          | 45          | 2000                      | 1800                     | 1000                      |
| 10           | Control       | Female | 28          | 28          | 1500                      | 1200                     | -                         |
| 11           | Control       | Male   | 25          | 50          | 2500                      | 2000                     | -                         |
| 12           | Intervention  | Male   | 21          | 53          | 2000                      | 2000                     | 1250                      |
| 13           | Intervention  | Female | 28          | 46          | 1500                      | 1800                     | 1000                      |
| 14           | Intervention  | Female | 15          | 35          | 1500                      | 1400                     | 750                       |
| 15           | Intervention  | Female | 26          | 70          | 2500                      | 2400                     | 1750                      |
| 16           | Control       | Female | 25          | 46          | 1500                      | 1800                     | -                         |
| 17           | Control       | Female | 15          | 36          | 1500                      | 1400                     | -                         |
| 18           | Intervention  | Female | 21          | 26          | 1000                      | 1000                     | 750                       |
| 19           | Control       | Male   | 19          | 39          | 1500                      | 1600                     | -                         |
| 20           | Control       | Male   | 23          | 62          | 2000                      | 2400                     | -                         |
| 21           | Intervention  | Male   | 21          | 53          | 2000                      | 2100                     | 1250                      |
| 22           | Intervention  | Female | 19          | 59          | 2000                      | 2400                     | 1500                      |
| 23           | Intervention  | Female | 13          | 44          | 2000                      | 1800                     | 1000                      |

**Supplementary Table 2 – Description of trial defaulters**

| Study number | Treatment arm | Duration of follow up (days) | Reason for defaulting                                 |
|--------------|---------------|------------------------------|-------------------------------------------------------|
| 6            | Intervention  | 54                           | Died (Causes of death: Complications of Thalassaemia) |
| 18           | Intervention  | 120                          | Changed follow-up to a different thalassaemia centre  |

**Supplementary Table 3 – Description of subjects deviated from the treatment protocol**

| <b>Study number</b> | <b>Treatment arm</b> | <b>Duration in the treatment protocol (days)</b> | <b>Reason for protocol deviation</b>  |
|---------------------|----------------------|--------------------------------------------------|---------------------------------------|
| 8                   | Intervention         | 157                                              | Deferiprone stopped due to arthralgia |
| 12                  | Intervention         | 32                                               | Deferiprone stopped due to arthralgia |
| 21                  | Intervention         | 81                                               | Deferiprone stopped due to arthralgia |
| 22                  | Intervention         | 7                                                | Deferiprone stopped due to arthralgia |
| 23                  | Intervention         | 69                                               | Deferiprone stopped due to arthralgia |

**Supplementary Table 4 – Serum ferritin at 3 and 6 months compared to the baseline of the participants who completed the trial per-protocol**

| <b>Number (%) showing reduction in serum ferritin compared to baseline</b>              | <b>Intervention arm (n=8)</b> | <b>Control arm (n=8)</b> | <b>OR (95% CI)</b>             | <b>p-value</b> |
|-----------------------------------------------------------------------------------------|-------------------------------|--------------------------|--------------------------------|----------------|
| At completion of 3 months                                                               | 4 (50.0%)                     | 6 (75%)                  | 0.33<br>(0.04-2.76)            | 0.30           |
| At completion of 6 months                                                               | 8 (100%)                      | 5 (62.5%)                | 10.8 (0.46-252)                | 0.05           |
|                                                                                         |                               |                          |                                |                |
| <b>Number (%) showing &gt;500ng/mL reduction in serum ferritin compared to baseline</b> | <b>Intervention arm (n=8)</b> | <b>Control arm (n=8)</b> | <b>OR (95% CI)</b>             |                |
| At completion of 3 months                                                               | 4 (50.0%)                     | 3 (37.5%)                | 1.66 (0.22-12.2)               | 0.61           |
| At completion of 6 months                                                               | 6 (75.0%)                     | 4 (50.0%)                | 3.0 (0.36-24.9)                | 0.30           |
|                                                                                         |                               |                          |                                |                |
| <b>Change of serum ferritin from baseline (Mean±SD)</b>                                 | <b>Intervention arm (n=8)</b> | <b>Control arm (n=8)</b> | <b>Mean difference (95%CI)</b> |                |
| At completion of 3 months                                                               | -310 (±997)                   | -192 (±639)              | -117<br>(-1016 to 780)         | 0.78           |
| At completion of 6 months                                                               | -1048 (±824)                  | 82 (±1588)               | -1131 (-2488 to 225)           | 0.09           |

**Supplementary Table 5 – Change of liver iron content as measured by T2\* MRI of the participants who completed the trial per-protocol<sup>1</sup>**

| <b>Number (%) showing decrease in liver iron content compared to baseline</b> | <b>Intervention arm (n=7)</b> | <b>Control arm (n=5)</b> | <b>OR (95% CI)</b>             | <b>p-value</b> |
|-------------------------------------------------------------------------------|-------------------------------|--------------------------|--------------------------------|----------------|
| Any decrease in liver iron content                                            | 4 (57.1%)                     | 3 (60.0%)                | 0.88<br>(0.08 - 9.19)          | 0.92           |
| More than 10% decrease in the liver iron content                              | 4 (57.1%)                     | 3 (60.0%)                | 0.88<br>(0.08 - 9.19)          | 0.92           |
| <b>Change of liver iron content from baseline</b>                             | <b>Intervention arm (n=7)</b> | <b>Control arm (n=5)</b> | <b>Mean difference (95%CI)</b> | <b>p-value</b> |
| Mean(±SD) change of liver iron content (mg/g)                                 | -0.40 (±3.7)                  | 0.75 (±3.2)              | -1.15 (-5.76 to 3.45)          | 0.58           |

<sup>1</sup> Only 12 participants (intervention-7; control-5) had pre- and post-treatment liver MRI due to limitation in facilities

**Supplementary Table 6 – Change of cardiac T2\* value of the participants who completed the trial per-protocol<sup>2</sup>**

| <b>Number (%) showing increase in cardiac T2* compared to baseline</b> | <b>Intervention arm (n=7)</b> | <b>Control arm (n=5)</b> | <b>OR (95% CI)</b>             | <b>p-value</b> |
|------------------------------------------------------------------------|-------------------------------|--------------------------|--------------------------------|----------------|
| Any increase in cardiac T2*                                            | 5 (71.4%)                     | 1 (20.0%)                | 10.0 (0.64-154.3)              | 0.07           |
| More than 10% increase in cardiac T2*                                  | 4 (57.1%)                     | 1 (20.0%)                | 5.33 (0.37-75.7)               | 0.19           |
| <b>Change of cardiac T2* from baseline</b>                             | <b>Intervention arm (n=7)</b> | <b>Control arm (n=5)</b> | <b>Mean difference (95%CI)</b> | <b>p-value</b> |
| Mean(±SD) change of cardiac T2* (ms)                                   | 8.20 (±11.2)                  | -3.00 (±8.24)            | 11.20 (-2.06 to 24.46)         | 0.08           |

<sup>2</sup> Only 12 participants (intervention-7; control-5) had pre- and post-treatment cardiac MRI due to limitation in facilities

**Supplementary Table 7 – Details of the subjects who discontinued the trail due to the development of arthralgia**

| <b>Study number</b> | <b>Age (years)</b> | <b>Gender</b> | <b>Duration of treatment before arthralgia (days)</b> | <b>Joints involved</b> |
|---------------------|--------------------|---------------|-------------------------------------------------------|------------------------|
| 8                   | 28                 | Male          | 157                                                   | Knee joints            |
| 12                  | 21                 | Male          | 32                                                    | Knee joints            |
| 21                  | 21                 | Male          | 81                                                    | Knee joints            |
| 22                  | 19                 | Female        | 7                                                     | Knee joints            |
| 23                  | 13                 | Female        | 69                                                    | Ankle joints           |
